# Supplementary material for: Analytic Hierarchy Process Based Land Suitability for Organic Farming in the Arid Region
Source: MDPI journal article supplement (doi:10.3390/su14084542), 2022-04-11
Supplement: s1 [file s1]

Article

# Analytic Hierarchy Process Based Land Suitability for Organic Farming in the Arid Region

Table S1 Pairwise Comparison matrix.

| Class        | Geology    | Soil pH    | Soil Texture | LULC        | LST         | DD          | Road        | Slope       | SOC         | Salinity    | NDVI        | Rainfall    |
|--------------|------------|------------|--------------|-------------|-------------|-------------|-------------|-------------|-------------|-------------|-------------|-------------|
| Geology      | 1.00       | 2.00       | 3.00         | 4.00        | 5.00        | 6.00        | 6.00        | 7.00        | 7.00        | 8.00        | 8.00        | 9.00        |
| Soil pH      | 0.50       | 1.00       | 2.00         | 3.00        | 4.00        | 5.00        | 6.00        | 6.00        | 7.00        | 7.00        | 8.00        | 8.00        |
| Soil Texture | 0.33       | 0.50       | 1.00         | 2.00        | 3.00        | 4.00        | 5.00        | 6.00        | 6.00        | 7.00        | 7.00        | 8.00        |
| Lulc         | 0.25       | 0.33       | 0.50         | 1.00        | 2.00        | 3.00        | 4.00        | 5.00        | 6.00        | 6.00        | 7.00        | 7.00        |
| LST          | 0.20       | 0.25       | 0.33         | 0.50        | 1.00        | 2.00        | 3.00        | 4.00        | 5.00        | 6.00        | 6.00        | 7.00        |
| DD           | 0.17       | 0.20       | 0.25         | 0.33        | 0.50        | 1.00        | 2.00        | 3.00        | 4.00        | 5.00        | 6.00        | 6.00        |
| Road         | 0.17       | 0.17       | 0.20         | 0.20        | 0.25        | 0.33        | 1.00        | 2.00        | 3.00        | 4.00        | 5.00        | 6.00        |
| Slope        | 0.14       | 0.17       | 0.17         | 0.17        | 0.20        | 0.25        | 0.50        | 1.00        | 2.00        | 3.00        | 4.00        | 5.00        |
| SOC          | 0.14       | 0.14       | 0.17         | 0.17        | 0.17        | 0.20        | 0.25        | 0.50        | 1.00        | 2.00        | 3.00        | 4.00        |
| Salinity     | 0.13       | 0.14       | 0.14         | 0.14        | 0.17        | 0.17        | 0.20        | 0.33        | 0.50        | 1.00        | 2.00        | 3.00        |
| NDVI         | 0.13       | 0.13       | 0.14         | 0.14        | 0.14        | 0.17        | 0.17        | 0.25        | 0.33        | 0.50        | 1.00        | 2.00        |
| Rainfall     | 0.11       | 0.13       | 0.14         | 0.14        | 0.14        | 0.17        | 0.17        | 0.20        | 0.25        | 0.33        | 0.50        | 1.00        |
|              | <b>3.3</b> | <b>5.2</b> | <b>8.0</b>   | <b>11.8</b> | <b>16.6</b> | <b>22.3</b> | <b>28.3</b> | <b>35.3</b> | <b>42.1</b> | <b>49.8</b> | <b>57.5</b> | <b>66.0</b> |

**Table S2 Normalized Comparison matrix.**

[illegible]
